# Supplementary material for: Atherogenic Index of Plasma Predicts Obstructive Coronary Artery Disease in Patients with Stable Angina Pectoris
Source: MDPI journal article supplement (doi:10.3390/diagnostics13203249), 2023-10-19
Supplement: s1 [file s1]

**Table S1 Correlation of AIP and cholesterol values**

| Variable    | r     | P value |
|-------------|-------|---------|
| TG mg/dl    | 0,85  | < 0.000 |
| HDL-C mg/dl | -0,71 | <0,0001 |
| LDL-C mg/dl | 0.1   | 0.06    |

r: correlation coefficient; Other abbreviations as in Table 1.
